# Supplementary material for: Growing Season Conditions and Isolate Are Important Determinants of Brassica Napus Susceptibility to Aggressive Sclerotinia Sclerotiorum Isolates
Source: Preprints.org preprint supplement (doi:10.20944/preprints202305.2270.v1), 2023-05-31
Supplement: Supplementary file 1 [file supplementary]

## Sheet: correlation
Table S1. Pearson’s correlation coefficient matrix using all 27 disease variables measured for nine commercial Australian B. napus varieties stem inoculated in 2019 and 2020 with four S. sclerotiorum isolates; CU8.20, CU11.7, CU11.19, CU8.24. AUDPS (area under the disease progress stairs); d (days); TT (accumulated thermal time, °C days).
	Stem width	Lesion length (28d)	Lesion area	AUDPS	Seed production	Total sclerotia	Total sclerotia weight	Average sclerotia weight	Flowering time	Days inoculation to harvest	Average minimum temperature inoculation to harvest	Average maximum temperature inoculation to harvest	Average daily temperature inoculation to harvest	Accumulated thermal time inoculation to harvest	Average minimum temperature inoculation to 7 days post	Average maximum temperature inoculation to 7 days post	Average daily temperature inoculation to 7 days post	Accumulated thermal time inoculation to 7 days post	Average minimum temperature during AUDPS	Average maximum temperature during AUDPS	Average daily temperature during AUDPS	Accumulated thermal time during AUDPS	Days post AUDPS to harvest	Average minimum temperature post AUDPS to harvest	Average maximum temperature post AUDPS to harvest	Average daily temperature inoculation post AUDPS to harvest	Accumulated thermal time inoculation post AUDPS to harvest
Stem width	1
Lesion length (28d)	-0.4	1
Lesion area	-0.12	0.93	1
AUDPS	-0.41	0.98	0.91	1
Seed production	0.08	-0.54	-0.52	-0.56	1
Total sclerotia	-0.12	0.39	0.41	0.41	-0.26	1
Total sclerotia weight	0.18	-0.03	0.08	-0.03	0.01	0.88	1
Average sclerotia weight	0.12	0.07	0.16	0.06	0.1	0.11	0.46	1
Flowering time (days to 30% flowering)	0.33	-0.21	-0.21	-0.25	-0.14	-0.28	-0.17	-0.04	1
Days inoculation to harvest	-0.35	0.15	0.15	0.19	0.24	0.32	0.25	0.08	-0.97	1
Average minimum temperature inoculation to harvest	-0.2	-0.14	-0.14	-0.13	0.45	0.23	0.26	0.09	-0.28	0.51	1
Average maximum temperature inoculation to harvest	-0.22	-0.13	-0.12	-0.12	0.46	0.25	0.28	0.1	-0.36	0.58	0.99	1
Average daily temperature inoculation to harvest	-0.21	-0.14	-0.14	-0.13	0.46	0.24	0.27	0.1	-0.32	0.54	1	1	1
Accumulated thermal time inoculation to harvest	-0.32	0.02	0.02	0.05	0.39	0.32	0.31	0.11	-0.77	0.9	0.83	0.88	0.85	1
Average minimum temperature inoculation to 7 days post	0.2	-0.08	-0.04	-0.04	-0.04	0.03	0.05	-0.03	-0.04	0.01	0.01	-0.05	-0.03	0	1
Average maximum temperature inoculation to 7 days post	0.23	-0.29	-0.26	-0.28	0.25	0.01	0.23	0.05	0.09	-0.01	0.31	0.28	0.3	0.16	0.75	1
Average daily temperature inoculation to 7 days post	0.29	-0.22	-0.18	-0.19	0.06	-0.02	0.14	0.01	0.15	-0.14	0.05	0	0.02	-0.06	0.92	0.93	1
Accumulated thermal time inoculation to 7 days post	0.24	-0.24	-0.21	-0.22	0.15	0	0.17	0.01	0.08	-0.04	0.21	0.15	0.18	0.08	0.89	0.97	0.98	1
Average minimum temperature during AUDPS	0.11	0.02	-0.02	0.02	-0.23	-0.14	-0.21	-0.11	0.65	-0.63	-0.15	-0.25	-0.21	-0.5	0.31	0.05	0.24	0.17	1
Average maximum temperature during AUDPS	-0.24	-0.15	-0.15	-0.14	0.48	0.19	0.24	0.07	-0.3	0.51	0.96	0.96	0.96	0.81	-0.11	0.22	-0.07	0.11	-0.24	1
Average daily temperature during AUDPS	-0.15	-0.13	-0.16	-0.12	0.28	0.05	0.03	-0.03	0.16	0.03	0.75	0.67	0.7	0.37	0.06	0.19	0.05	0.18	0.42	0.77	1
Accumulated thermal time during AUDPS	-0.22	-0.12	-0.14	-0.11	0.38	0.14	0.13	0.01	-0.09	0.31	0.91	0.86	0.88	0.64	0.03	0.23	0.02	0.18	0.17	0.92	0.95	1
Days post AUDPS to harvest	-0.35	0.15	0.15	0.19	0.24	0.32	0.25	0.08	-0.97	1	0.51	0.58	0.54	0.9	0.01	-0.01	-0.14	-0.04	-0.63	0.51	0.03	0.31	1
Average minimum temperature post AUDPS to harvest	-0.22	-0.14	-0.13	-0.14	0.48	0.24	0.29	0.12	-0.4	0.6	0.96	0.98	0.98	0.88	-0.13	0.22	-0.07	0.09	-0.39	0.97	0.61	0.81	0.6	1
Average maximum temperature post AUDPS to harvest	-0.19	-0.14	-0.14	-0.13	0.45	0.25	0.28	0.11	-0.3	0.53	0.99	1	1	0.84	-0.02	0.31	0.03	0.18	-0.2	0.94	0.67	0.86	0.53	0.97	1
Average daily temperature inoculation post AUDPS to harvest	-0.19	-0.16	-0.15	-0.15	0.47	0.24	0.28	0.11	-0.3	0.52	0.99	1	1	0.84	-0.04	0.31	0.02	0.18	-0.24	0.95	0.66	0.85	0.52	0.98	1	1
Accumulated thermal time inoculation post AUDPS to harvest	-0.32	0.04	0.04	0.06	0.37	0.33	0.32	0.12	-0.81	0.93	0.78	0.84	0.81	1	-0.01	0.13	-0.08	0.05	-0.57	0.76	0.28	0.56	0.93	0.84	0.8	0.8	1
(bold indicates signficance P<0.001)
